# Supplementary material
Source: PubMed Central journal article supplement (PMC3205313)

## Online Repository

Table E1. Bone marrow features of subjects with SM or HES.

| Feature                               | D816V-positive SM without peripheral eosinophilia (n=17) | FIP1L1/PDGFRΑ-negative HES (n=6) | P value* |
|---------------------------------------|----------------------------------------------------------|----------------------------------|----------|
| Median % cellularity (range)          | 55<br>(30-82)                                            | 58<br>(35-75)                    | 0.852    |
| Median % eosinophils (range)          | 5<br>(1-12)                                              | 13<br>(2-27)                     | 0.044    |
| Presence of mast cell aggregates      | 17/17                                                    | 1/6**                            | <0.001   |
| Median % mast cell aggregates (range) | 13<br>(3-55)                                             | NA                               | NA       |
| Spindle-shaped mast cells > 25%       | 17/17                                                    | 1/6                              | <0.001   |
| Presence of CD2+ mast cells           | 16/16                                                    | 0/6                              | <0.001   |
| Presence of CD25+ mast cells          | 16/16                                                    | 1/6                              | <0.001   |

\* Holm's adjusted for multiple comparisons

\*\* one small mast cell aggregate was seen

## Mast cells

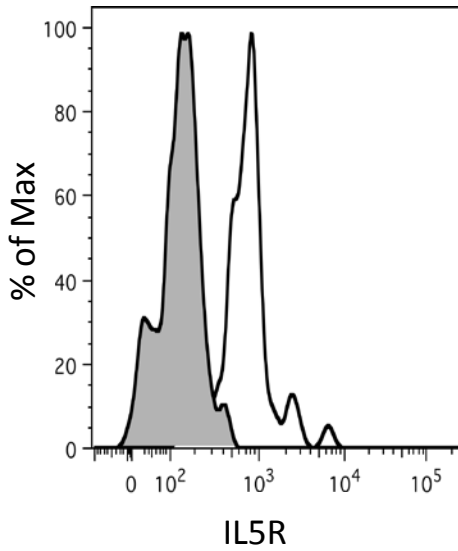

## Eosinophils

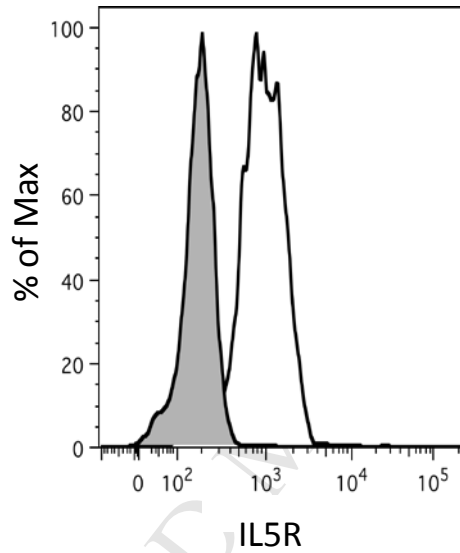

## Lymphocytes

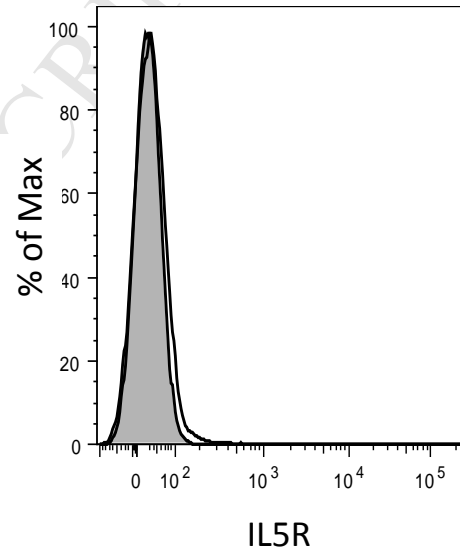

□ CDw125-PE  
■ IgG-PE

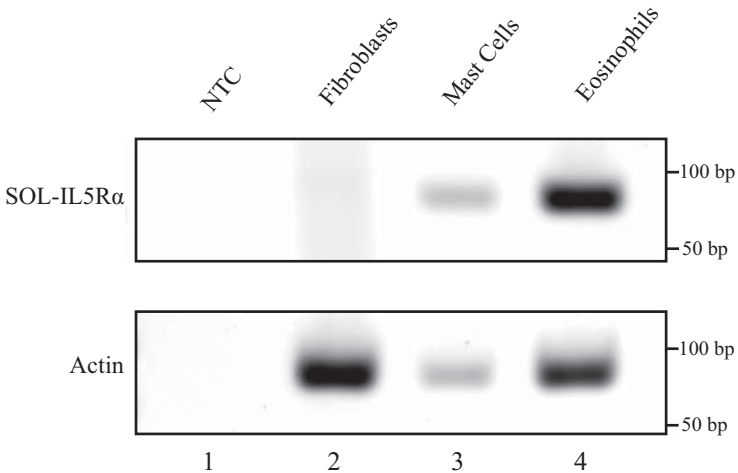

Supplement: NIHMS311803-supplement-01.pdf [file NIHMS311803-supplement-01.pdf]
